# Supplementary material for: Preliminary validity and reliability of a Thai Berlin questionnaire in stroke patients
Source: PubMed Central journal article supplement (PMC4060851; doi:10.1186/1756-0500-7-348), 2014-06-09
Supplement: 1756-0500-7-348-S3.pdf [file 1756-0500-7-348-S3.pdf]

# BERLIN QUESTIONNAIRE

ความสูง (ซม.) \_\_\_\_\_ น้ำหนัก (กก.) \_\_\_\_\_ อายุ \_\_\_\_\_ ชาย / หญิง

โปรดเลือกคำตอบที่ดีที่สุดในแต่ละคำถาม.

## หมวดที่ 1

1. คุณนอนกรนหรือไม่ ?

- a. ใช่
- b. ไม่
- c. ไม่ทราบ

ถ้าหากคุณกรน :

2. การกรนของคุณ

- a. ดังกว่าเสียงหายใจ
- b. ดังเท่ากับการพูดคุยเล็กน้อย
- c. เสียงดังกว่าการพูดคุย
- d. เสียงดังมาก – สามารถได้ยินถึงห้องติดกัน

3. คุณกรนบ่อยแค่ไหน

- a. เกือบทุกวัน
- b. 3 – 4 ครั้งต่อสัปดาห์
- c. 1 – 2 ครั้งต่อสัปดาห์
- d. 1 – 2 ครั้งต่อเดือน
- e. ไม่เคยหรือแทบจะไม่เคย

4. การกรนของคุณรบกวนผู้อื่นหรือไม่

- a. ใช่
- b. ไม่ใช่
- c. ไม่ทราบ

5. มีใครสังเกตเห็นว่าคุณหยุดหายใจในช่วงการนอนหลับหรือไม่

- a. เกือบทุกวัน
- b. 3 – 4 ครั้งต่อสัปดาห์
- c. 1 – 2 ครั้งต่อสัปดาห์
- d. 1 – 2 ครั้งต่อเดือน
- e. ไม่เคยหรือแทบจะไม่เคย

## หมวดที่ 2

6. คุณรู้สึกเหนื่อยหรือล้าหลังการนอนบ่อยเพียงใด ?

- a. เกือบทุกวัน
- b. 3 – 4 ครั้งต่อสัปดาห์
- c. 1 – 2 ครั้งต่อสัปดาห์
- d. 1 – 2 ครั้งต่อเดือน
- e. ไม่เคยหรือแทบจะไม่เคย

7. ในระหว่างที่คุณตื่น, คุณรู้สึกเหนื่อยล้าหรือรู้สึกไม่ดีเหมือนเดิมหรือไม่ ?

- a. เกือบทุกวัน
- b. 3 – 4 ครั้งต่อสัปดาห์
- c. 1 – 2 ครั้งต่อสัปดาห์
- d. 1 – 2 ครั้งต่อเดือน
- e. ไม่เคยหรือแทบจะไม่เคย

8. คุณเคยเผลอวูบหรือหลับขณะขับขียานพาหนะหรือไม่ ?

- a. ใช่
- b. ไม่

หากใช่ :

9. เหตุการณ์นี้เกิดบ่อยเพียงใด ?

- a. เกือบทุกวัน
- b. 3 – 4 ครั้งต่อสัปดาห์
- c. 1 – 2 ครั้งต่อสัปดาห์
- d. 1 – 2 ครั้งต่อเดือน
- e. ไม่เคยหรือแทบจะไม่เคย

## หมวดที่ 3

10. คุณมีความดันโลหิตสูงหรือไม่ ?

- a. ใช่
- b. ไม่ใช่
- c. ไม่ทราบ

## เกณฑ์การให้คะแนน

### หมวดที่ 1 ข้อ 1-5

ข้อ 1 หากตอบ a ให้ 1 คะแนน

ข้อ 2 หากตอบ c หรือ d ให้ 1 คะแนน

ข้อ 3 หากตอบ a หรือ b ให้ 1 คะแนน

ข้อ 4 หากตอบ a ให้ 1 คะแนน

ข้อ 5 หากตอบ a หรือ b ให้ 2 คะแนน

การรวมคะแนน หมวดที่ 1 ถือเป็นบวกเมื่อคะแนนรวมมากกว่าหรือเท่ากับ 2 คะแนน

### หมวดที่ 2 ข้อ 6-8 (ไม่รวมข้อ 9)

ข้อ 6 หากตอบ a หรือ b ให้ 1 คะแนน

ข้อ 7 หากตอบ a หรือ b ให้ 1 คะแนน

ข้อ 8 หากตอบ a ให้ 1 คะแนน

การรวมคะแนน หมวดที่ 2 ถือเป็นบวกเมื่อคะแนนรวมมากกว่าหรือเท่ากับ 2 คะแนน

หมวดที่ 3 จะถือเป็นบวกเมื่อตอบ a ในข้อ 10 คือเป็นความดันโลหิตสูง หรือ มีค่าดัชนีมวลกายมากกว่า  $30 \text{ kg/m}^2$

## การแปลผล

หากได้ผลเป็นบวกมากกว่าหรือเท่ากับ 2 หมวดถือว่ามีความเสี่ยงต่อการเกิดภาวะหยุดหายใจขณะหลับสูง

หากได้ผลเป็นบวก 1 หมวดหรือไม่มีหมวดใดมีค่าเป็นบวกถือว่ามีความเสี่ยงต่อการเกิดภาวะหยุดหายใจขณะหลับต่ำ
